# Supplementary material for: Early Prediction of Intensive Care Unit–Acquired Weakness Using Easily Available Parameters: A Prospective Observational Study
Source: PubMed Central journal article supplement (PMC4210178; doi:10.1371/journal.pone.0111259), 2014-10-27
Supplement: pone.0111259.s002.pdf [file pone.0111259.s002.pdf]

**Table S1: Descriptions and definitions for candidate predictors**

| candidate predictor                                 | class                          | description and definition                                                                              |
|-----------------------------------------------------|--------------------------------|---------------------------------------------------------------------------------------------------------|
| female gender                                       | yes/no                         |                                                                                                         |
| age                                                 | continuous (years)             |                                                                                                         |
| risk factor for a polyneuropathy in medical history | yes/no                         | history of diabetes, alcohol abuse, previous treatment with chemotherapy, kidney transplant or dialysis |
| pre-existing polyneuropathy prior to ICU admission  | yes/no                         | any pre-existing polyneuropathy                                                                         |
| systemic corticosteroid use prior to ICU admission  | yes/no                         | chronic (>1 month) systemic corticosteroid use                                                          |
| suspected sepsis                                    | yes/no                         | 2 or more SIRS criteria present and a suspected infection[1] in the first two ICU days*                 |
| unplanned admission                                 | yes/no                         |                                                                                                         |
| presence of shock                                   | yes/no                         | SOFA cardiovascular score of 4 in the first two ICU days                                                |
| RASS score                                          | ordinal scale (-5 to 4)        | assessment at two days after ICU admission                                                              |
| average urine production                            | continuous (ml/h)              | in the first two ICU days                                                                               |
| highest glucose                                     | continuous (mg/dl)             | in the first two ICU days                                                                               |
| lowest glucose                                      | continuous (mg/dl)             | in the first two ICU days                                                                               |
| lowest pH                                           | continuous                     | in the first two ICU days                                                                               |
| lowest P/F ratio                                    | continuous                     | in the first two ICU days                                                                               |
| lowest platelet count                               | continuous ( $\times 10^9/L$ ) | in the first two ICU days                                                                               |
| highest lactate                                     | continuous (mmol/L)            | in the first two ICU days                                                                               |
| lowest ionized $Ca^{2+}$                            | continuous (mmol/L)            | in the first two ICU days                                                                               |
| treatment with any corticosteroid                   | yes/no                         | in the first two ICU days                                                                               |
| repeated treatment with any neuromuscular blocker   | yes/no                         | more than one administration of any neuromuscular blocker in the first two ICU days                     |
| treatment with any aminoglycoside                   | yes/no                         | in the first two ICU days                                                                               |

\*originally coded as no SIRS, SIRS or suspected sepsis but because of low number of patients no SIRS (N:4)  
recoded into suspected sepsis yes/no

SIRS: systemic inflammatory response syndrome; SOFA: Sequential Organ Failure Assessment; RASS:  
Richmond Agitation and Sedation Scale; ICU: Intensive Care Unit.

## **Literature for Table S1**

1. American College of Chest Physicians/Society of Critical Care Medicine  
Consensus Conference: definitions for sepsis and organ failure and guidelines  
for the use of innovative therapies in sepsis. (1992). Crit Care Med 20: 864–  
874.
